# Supplementary material for: Enhanced energy storage properties of KNbO3 modified (Bi0.5Na0.5)TiO3–BaTiO3 based lead-free relaxor ferroelectric ceramics
Source: Royal Society of Chemistry journal article supplement (doi:10.1039/d2nj04126j), 2022-01-01
Supplement: d2nj04126j1.pdf [file d2nj04126j1.pdf]

## Supplementary information

### Enhanced energy storage properties of $(\text{Bi}_{0.5}\text{Na}_{0.5})\text{TiO}_3\text{-BaTiO}_3$ based lead-free relaxor ferroelectric ceramics

Fan Yang, Qiang Li \*, Dingwei Hou, Yuxin Jia, Weijia Wang, Huiqing Fan

State Key Laboratory of Solidification Processing, School of Materials Science and  
Engineering, Northwestern Polytechnical University, Xi'an 710072, P. R. China

\*E-mail addresses of corresponding authors : [jerrylee57318@hotmail.com](mailto:jerrylee57318@hotmail.com) (Qiang Li)

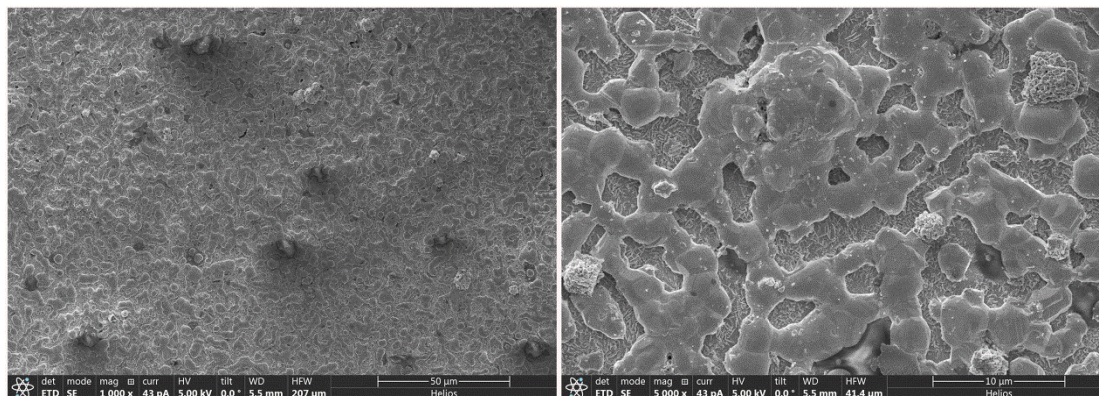

Fig. S1. SEM images of silver electrodes after curing.

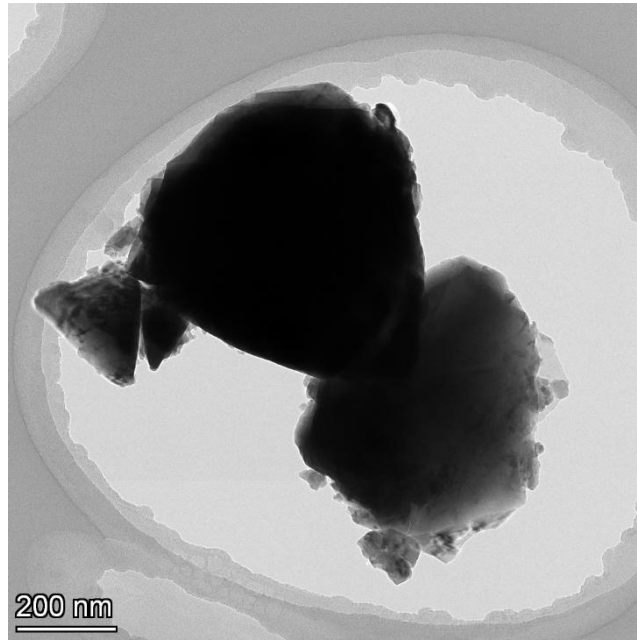

Fig. S2 The bright-field TEM image of BNBTYN-5KN ceramic powder.
